# Supplementary material
Source: publisher site journal article supplement (https://www.dovepress.com/article/340559)
Supplement: Supplementary file 1 [file get_supplementary_file.php]

**Supplementary File**

**A comparative study of the respiratory neonatal outcomes utilizing dexamethasone sodium phosphate versus a mixture of betamethasone dipropionate and betamethasone sodium phosphate as an antenatal corticosteroid therapy**

Omar F. Altal1*, Ahmed H. Al Sharie2, Yazan O. Al Zu’bi2, Saif Aldin Rawabdeh3, Wasim Khasawneh3, Tamara Dawaymeh2, Haneen Tashtoush2, Rawan Obeidat1, Omar M. Halalsheh4

1 Department of Obstetrics & Gynecology, Faculty of Medicine, Jordan University of Science & Technology, Irbid, Jordan.

2 Faculty of Medicine, Jordan University of Science & Technology, Irbid, Jordan.

3 Department of Pediatrics and Neonatology, Faculty of Medicine, Jordan University of Science and Technology, Jordan.

4 Department of General Surgery and Urology, Faculty of Medicine, Jordan University of Science & Technology, Irbid, Jordan.

**Running title:** The use antenatal dexamethasone versus betamethasone for preterm births.

***Correspondence**:

Omar F. Altal

Department of Obstetrics & Gynecology, Faculty of Medicine, Jordan University of Science & Technology, Irbid, Jordan.

P. O. Box: 3030, Irbid-22110, Jordan.

Tel: +962797423400, Fax: +962 2 7201064

Email: [altal_omar@yahoo.com](mailto:altal_omar@yahoo.com)

| **Table S1.** A comparative analysis of the respiratory neonatal outcomes and therapeutic interventions between DSP and B-DP/SP in extremely preterm neonates. | | | |
| --- | --- | --- | --- |
| **Variables** | **Extremely preterm (*n* = 24)** | | |
| **B-DP/SP** | **DSP** | ***P*-value** |
| Respiratory distress syndrome | 6 (85.7) | 15 (88.2) | 1.000 |
| Apnea of prematurity | 5 (71.4) | 10 (58.8) | .669 |
| Transient tachypnea of the newborn | 0 (0.0) | 1 (5.9) | 1.000 |
| Chronic lung disease |  |  | .038 |
| No | 1 (14.3) | 13 (76.5) |  |
| Mild | 3 (42.9) | 2 (11.8) |  |
| Moderate | 1 (14.3) | 1 (5.9) |  |
| Severe | 2 (28.6) | 1 (5.9) |  |
| Pneumothorax | 2 (40.0) | 3 (18.8) | .553 |
| Congenital pneumonia | 0 (0.0) | 0 (0.0) | * |
| Pulmonary hemorrhage | 0 (0.0) | 2 (11.8) | 1.000 |
| Pulmonary hypertension | 0 (0.0) | 0 (0.0) | * |
| Meconium aspiration | 0 (0.0) | 0 (0.0) | * |
| Birth weight in grams | 885.9 ± 144.0 | 837.1 ± 227.5 | .806 |
| Birth Depression | 0 (0.0) | 1 (5.9) | 1.000 |
| Small for gestational age | 0 (0.0) | 3 (17.6) | .530 |
| Large for gestational age | 0 (0.0) | 0 (0.0) | * |
| Apgar score at 5 minutes | 5.2 ± 1.1 | 5.8 ± 2.1 | .282 |
| Number of surfactant dosages |  |  | .058 |
| 0 | 1 (14.3) | 1 (5.9) |  |
| 1 | 3 (42.9) | 7 (41.2) |  |
| 2 | 1 (14.3) | 9 (52.9) |  |
| 3 | 2 (28.6) | 0 (0.0) |  |
| 4 | 0 (0.0) | 0 (0.0) |  |
| Use of aminophylline | 6 (85.7) | 11 (64.7) | .625 |
| Inhaled steroids | 6 (85.7) | 3 (17.6) | .004 |
| DARTa | 2 (28.6) | 5 (29.4) | 1.000 |
| Days on CMVb | 33.3 ± 36.8 | 7.9 ± 8.4 | < .001 |
| Days on CPAPc | 27.3 ± 16.9 | 8.2 ± 14.4 | < .001 |
| Days on HFNCd | 0.0 ± 0.0 | 3.2 ± 7.1 | .024 |
| Length of stay in days | 82.6 ± 42.0 | 20.6 ± 25.7 | < .001 |
| Mortality (Alive percentage) | 6 (85.7) | 3 (17.6) | .004 |
| Data is presented as mean ± standard deviation (SD) or frequency (percentage) within B-DP/SP and DSP groups. *Can’t generate a *P*-value due to insufficient data. aDexamethasone: A Randomized Trial. bContinuous mandatory ventilation. cContinuous positive airway pressure. dHigh flow nasal canula. | | | |

| **Table S2.** Binary logistic regression values with the respiratory distress syndrome as a dependent variable. | | | | | | | | |
| --- | --- | --- | --- | --- | --- | --- | --- | --- |
| **Variables** | **Intercept** | **Standard error** | ***P*-value** | **Odds ratio** | | **95th Confidence interval** | | |
| **Lower** | **Upper** | |
| Maternal age | -.012 | .020 | .537 | .988 | | .951 | 1.027 | |
| Neonatal gender | -.434 | .217 | .045 | .648 | | .424 | .991 | |
| Multiple gestations |  |  |  |  | |  |  | |
| Singleton |  |  | .002 |  | |  |  | |
| Twins | .029 | .246 | .906 | 1.029 | | .636 | 1.666 | |
| Triplets | 1.324 | .371 | .000 | 3.758 | | 1.816 | 7.777 | |
| Quadruplets | 1.148 | .887 | .196 | 3.151 | | .554 | 17.923 | |
| Type of steroid | .889 | .257 | .001 | 2.434 | | 1.472 | 4.024 | |
| Birth Weight | -.001 | .000 | .000 | .999 | | .999 | 1.000 | |
| Mode of delivery | -.355 | 1.513 | .815 | .701 | | .036 | 13.614 | |
| Elective vs. emergency | .233 | .274 | .395 | 1.262 | | .738 | 2.159 | |
| Type of anesthesia |  |  |  |  | |  |  | |
| Morphine |  |  | .705 |  | |  |  | |
| General anesthesia | .256 | .461 | .578 | 1.292 | | .524 | 3.187 | |
| Spinal anesthesia | 20.385 | 40192.969 | 1.000 | 712964397.033 | | .000 |  | |
| Epidural | -.224 | .236 | .342 | .799 | | .503 | 1.269 | |
| Chronic hypertension | 1.413 | .971 | .146 | 4.108 | | .612 | 27.572 | |
| Gestational hypertension | 1.183 | .682 | .083 | 3.263 | | .857 | 12.417 | |
| Pre-eclampsia | .294 | .400 | .462 | 1.342 | | .613 | 2.939 | |
| Gestational diabetes | -.804 | .546 | .140 | .447 | | .154 | 1.303 | |
| Diabetes mellitus | -1.722 | 1.090 | .114 | .179 | | .021 | 1.513 | |
| hypothyroidism | -.595 | .665 | .371 | .551 | | .150 | 2.031 | |
| Thrombophilia | .933 | .849 | .272 | 2.542 | | .481 | 13.424 | |
| Abruptio placenta | .118 | .497 | .812 | 1.125 | | .425 | 2.978 | |
| Placenta previa | 2.602 | 1.077 | .016 | 13.485 | | 1.634 | 111.274 | |
| Polyhydramnios | -18.762 | 40192.970 | 1.000 | .000 | | .000 | . | |
| Oligohydramnios | -.084 | .743 | .910 | .919 | | .214 | 3.944 | |
| Maternal HBsAga | 1.165 | 1.475 | .430 | 3.207 | | .178 | 57.787 | |
| Premature rupture of membranes | -.836 | .269 | .002 | .433 | | .256 | .734 | |
| Chorioamnionitis | 2.205 | .897 | .014 | 9.067 | | 1.563 | 52.607 | |
| Constant | 1.959 | 1.777 | .270 | 7.093 | |  |  | |
| aReactive Hepatitis B surface antigen. | | | | |  | | |  |

| **Table S3.** Binary logistic regression values with the meconium aspiration as a dependent variable. | | | | | | | | |
| --- | --- | --- | --- | --- | --- | --- | --- | --- |
| **Variables** | **Intercept** | **Standard error** | ***P*-value** | **Odds ratio** | | **95th Confidence interval** | | |
| **Lower** | **Upper** | |
| Maternal age | -.094 | .135 | .483 | .910 | | .699 | 1.185 | |
| Neonatal gender | -19.826 | 3461.250 | .995 | .000 | | .000 |  | |
| Multiple gestations |  |  |  |  | |  |  | |
| Singleton |  |  | 1.000 |  | |  |  | |
| Twins | -20.626 | 4265.382 | .996 | .000 | | .000 |  | |
| Triplets | -18.820 | 6608.183 | .998 | .000 | | .000 |  | |
| Quadruplets | -19.014 | 10892.205 | .999 | .000 | | .000 |  | |
| Type of steroid | -1.210 | 2.013 | .548 | .298 | | .006 | 15.414 | |
| Birth Weight | .000 | .001 | .898 | 1.000 | | .997 | 1.003 | |
| Elective vs. emergency | -1.574 | 2.329 | .499 | .207 | | .002 | 19.883 | |
| Type of anesthesia |  |  |  |  | |  |  | |
| Morphine |  |  | .843 |  | |  |  | |
| General anesthesia | -18.771 | 6489.180 | .998 | .000 | | .000 |  | |
| Spinal anesthesia | -1.036 | 1.772 | .559 | .355 | | .011 | 11.437 | |
| Chronic hypertension | .118 | 24793.948 | 1.000 | 1.126 | | .000 |  | |
| Gestational hypertension | 4.519 | 21202.737 | 1.000 | 91.738 | | .000 |  | |
| Pre-eclampsia | -18.882 | 10690.483 | .999 | .000 | | .000 |  | |
| Gestational diabetes | -16.637 | 14878.533 | .999 | .000 | | .000 |  | |
| Diabetes mellitus | -22.225 | 24551.164 | .999 | .000 | | .000 |  | |
| hypothyroidism | -2.489 | 16460.022 | 1.000 | .083 | | .000 |  | |
| Thrombophilia | -18.023 | 14594.893 | .999 | .000 | | .000 |  | |
| Abruptio placenta | -.081 | 2.347 | .972 | .922 | | .009 | 91.767 | |
| Placenta previa | -19.870 | 15927.645 | .999 | .000 | | .000 |  | |
| Polyhydramnios | 3.034 | 47098.137 | 1.000 | 20.774 | | .000 |  | |
| Oligohydramnios | 1.169 | 13351.147 | 1.000 | 3.219 | | .000 |  | |
| Maternal HBsAga | -2.666 | 40341.729 | 1.000 | .070 | | .000 |  | |
| Premature rupture of membranes | -2.437 | 2.468 | .324 | .087 | | .001 | 11.036 | |
| Chorioamnionitis | 3.342 | 40418.663 | 1.000 | 28.280 | | .000 |  | |
| Constant | 5.553 | 5.362 | .300 | 257.964 | |  |  | |
| aReactive Hepatitis B surface antigen. | | | | |  | | |  |

| **Table S4.** Binary logistic regression values with the inhaled steroids as a dependent variable. | | | | | | |  |
| --- | --- | --- | --- | --- | --- | --- | --- |
| **Variables** | **Intercept** | **Standard error** | ***P*-value** | **Odds ratio** | **95th Confidence interval** | | |
| **Lower** | **Upper** | |
| Maternal age | -.040 | .031 | .193 | .961 | .905 | 1.020 | |
| Neonatal gender | .435 | .325 | .181 | 1.546 | .817 | 2.923 | |
| Multiple gestations |  |  |  |  |  |  | |
| Singleton |  |  | .051 |  |  |  | |
| Twins | -.338 | .387 | .382 | .713 | .334 | 1.523 | |
| Triplets | .269 | .465 | .563 | 1.309 | .526 | 3.260 | |
| Quadruplets | 2.430 | 1.064 | .022 | 11.358 | 1.410 | 91.477 | |
| Type of steroid | .881 | .472 | .062 | 2.413 | .958 | 6.081 | |
| Birth Weight | -.002 | .000 | .000 | .998 | .998 | .999 | |
| Mode of delivery | 15.772 | 28420.554 | 1.000 | 7073336.070 | .000 |  | |
| Elective vs. emergency | .311 | .518 | .548 | 1.365 | .494 | 3.771 | |
| Type of anesthesia |  |  |  |  |  |  | |
| Morphine |  |  | .583 |  |  |  | |
| General anesthesia | -1.508 | 1.080 | .162 | .221 | .027 | 1.837 | |
| Spinal anesthesia | -3.239 | 49226.037 | 1.000 | .039 | .000 |  | |
| Epidural | -.051 | .346 | .883 | .950 | .483 | 1.871 | |
| Chronic hypertension | -20.084 | 12959.832 | .999 | .000 | .000 |  | |
| Gestational hypertension | -18.742 | 11018.046 | .999 | .000 | .000 |  | |
| Pre-eclampsia | .742 | .538 | .168 | 2.100 | .731 | 6.030 | |
| Gestational diabetes | -.791 | 1.197 | .509 | .453 | .043 | 4.737 | |
| Diabetes mellitus | 2.208 | 1.443 | .126 | 9.099 | .538 | 153.843 | |
| hypothyroidism | -18.761 | 11125.913 | .999 | .000 | .000 |  | |
| Thrombophilia | -2.099 | 1.470 | .153 | .123 | .007 | 2.184 | |
| Abruptio placenta | .607 | .659 | .357 | 1.835 | .505 | 6.670 | |
| Placenta previa | 1.926 | .770 | .012 | 6.864 | 1.517 | 31.047 | |
| Polyhydramnios | -19.265 | 40192.970 | 1.000 | .000 | .000 |  | |
| Oligohydramnios | -19.439 | 11777.334 | .999 | .000 | .000 |  | |
| Maternal HBsAga | -18.799 | 22696.722 | .999 | .000 | .000 |  | |
| Premature rupture of membranes | .154 | .414 | .710 | 1.166 | .518 | 2.626 | |
| Chorioamnionitis | 1.122 | .912 | .219 | 3.070 | .514 | 18.340 | |
| Constant | -14.652 | 28420.554 | 1.000 | .000 |  |  | |
| aReactive Hepatitis B surface antigen. | | | | | | | |
